# Supplementary material
Source: PubMed Central journal article supplement (PMC4116590)

### VIM

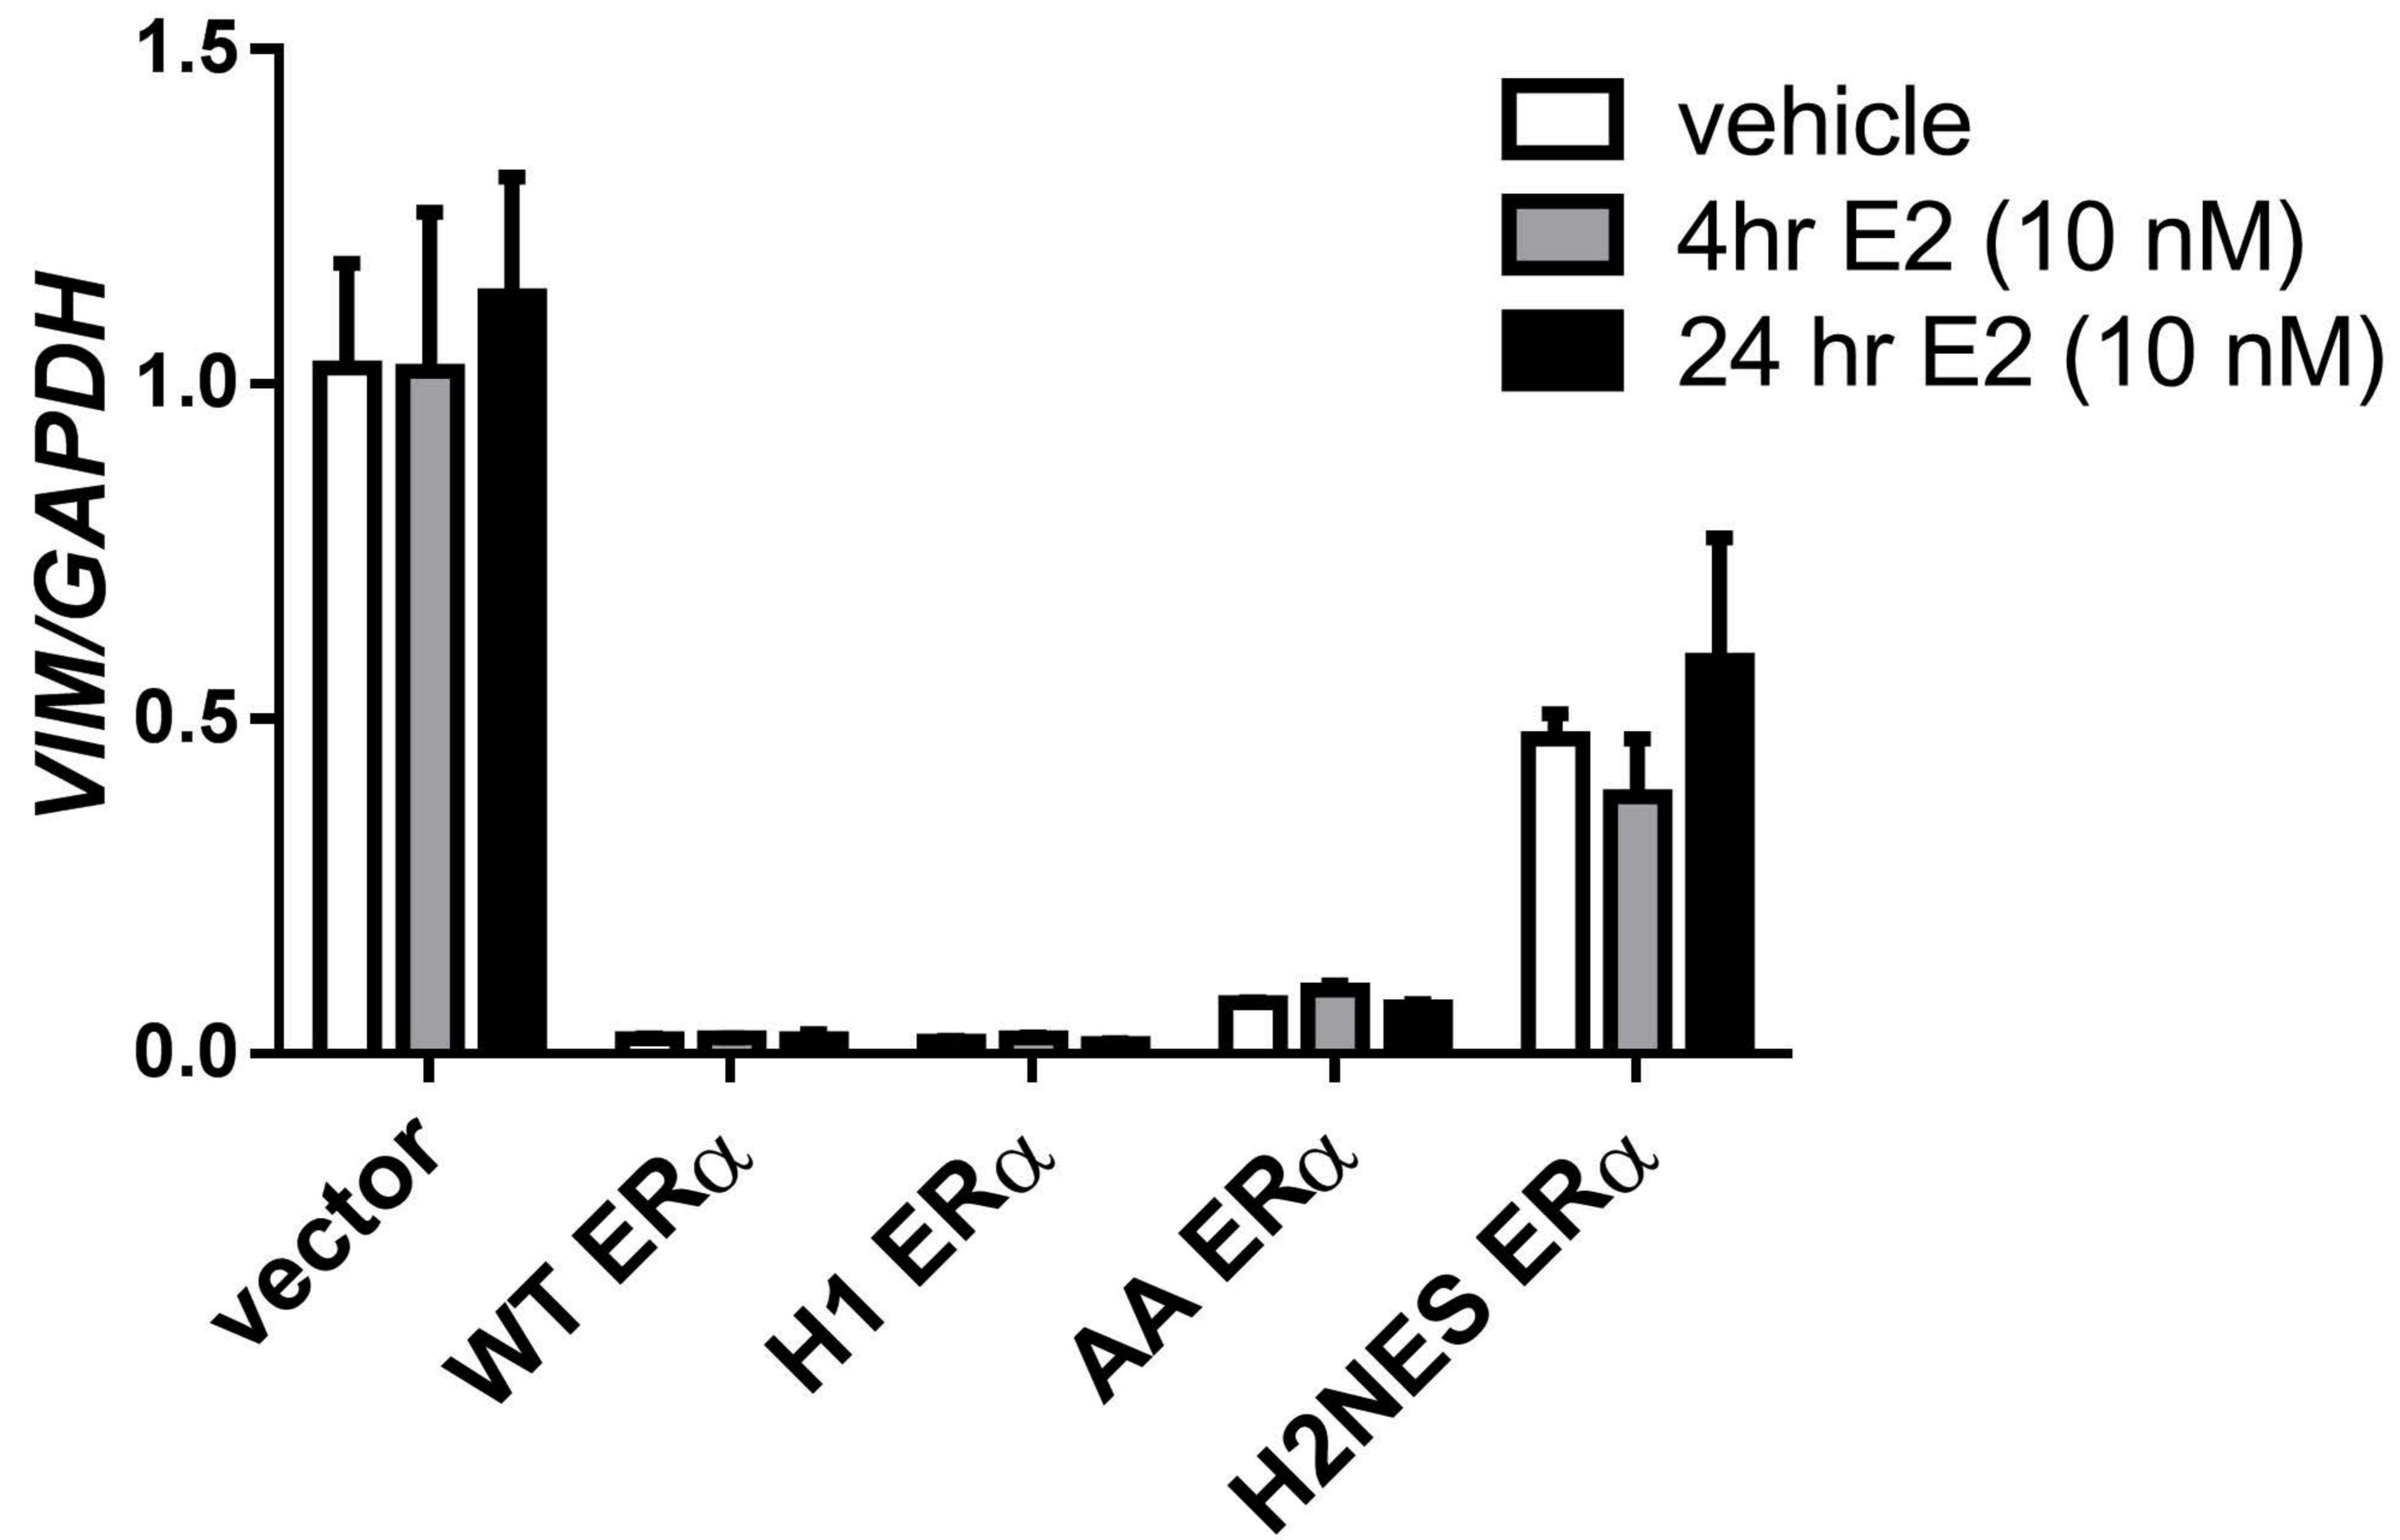

### WDR69

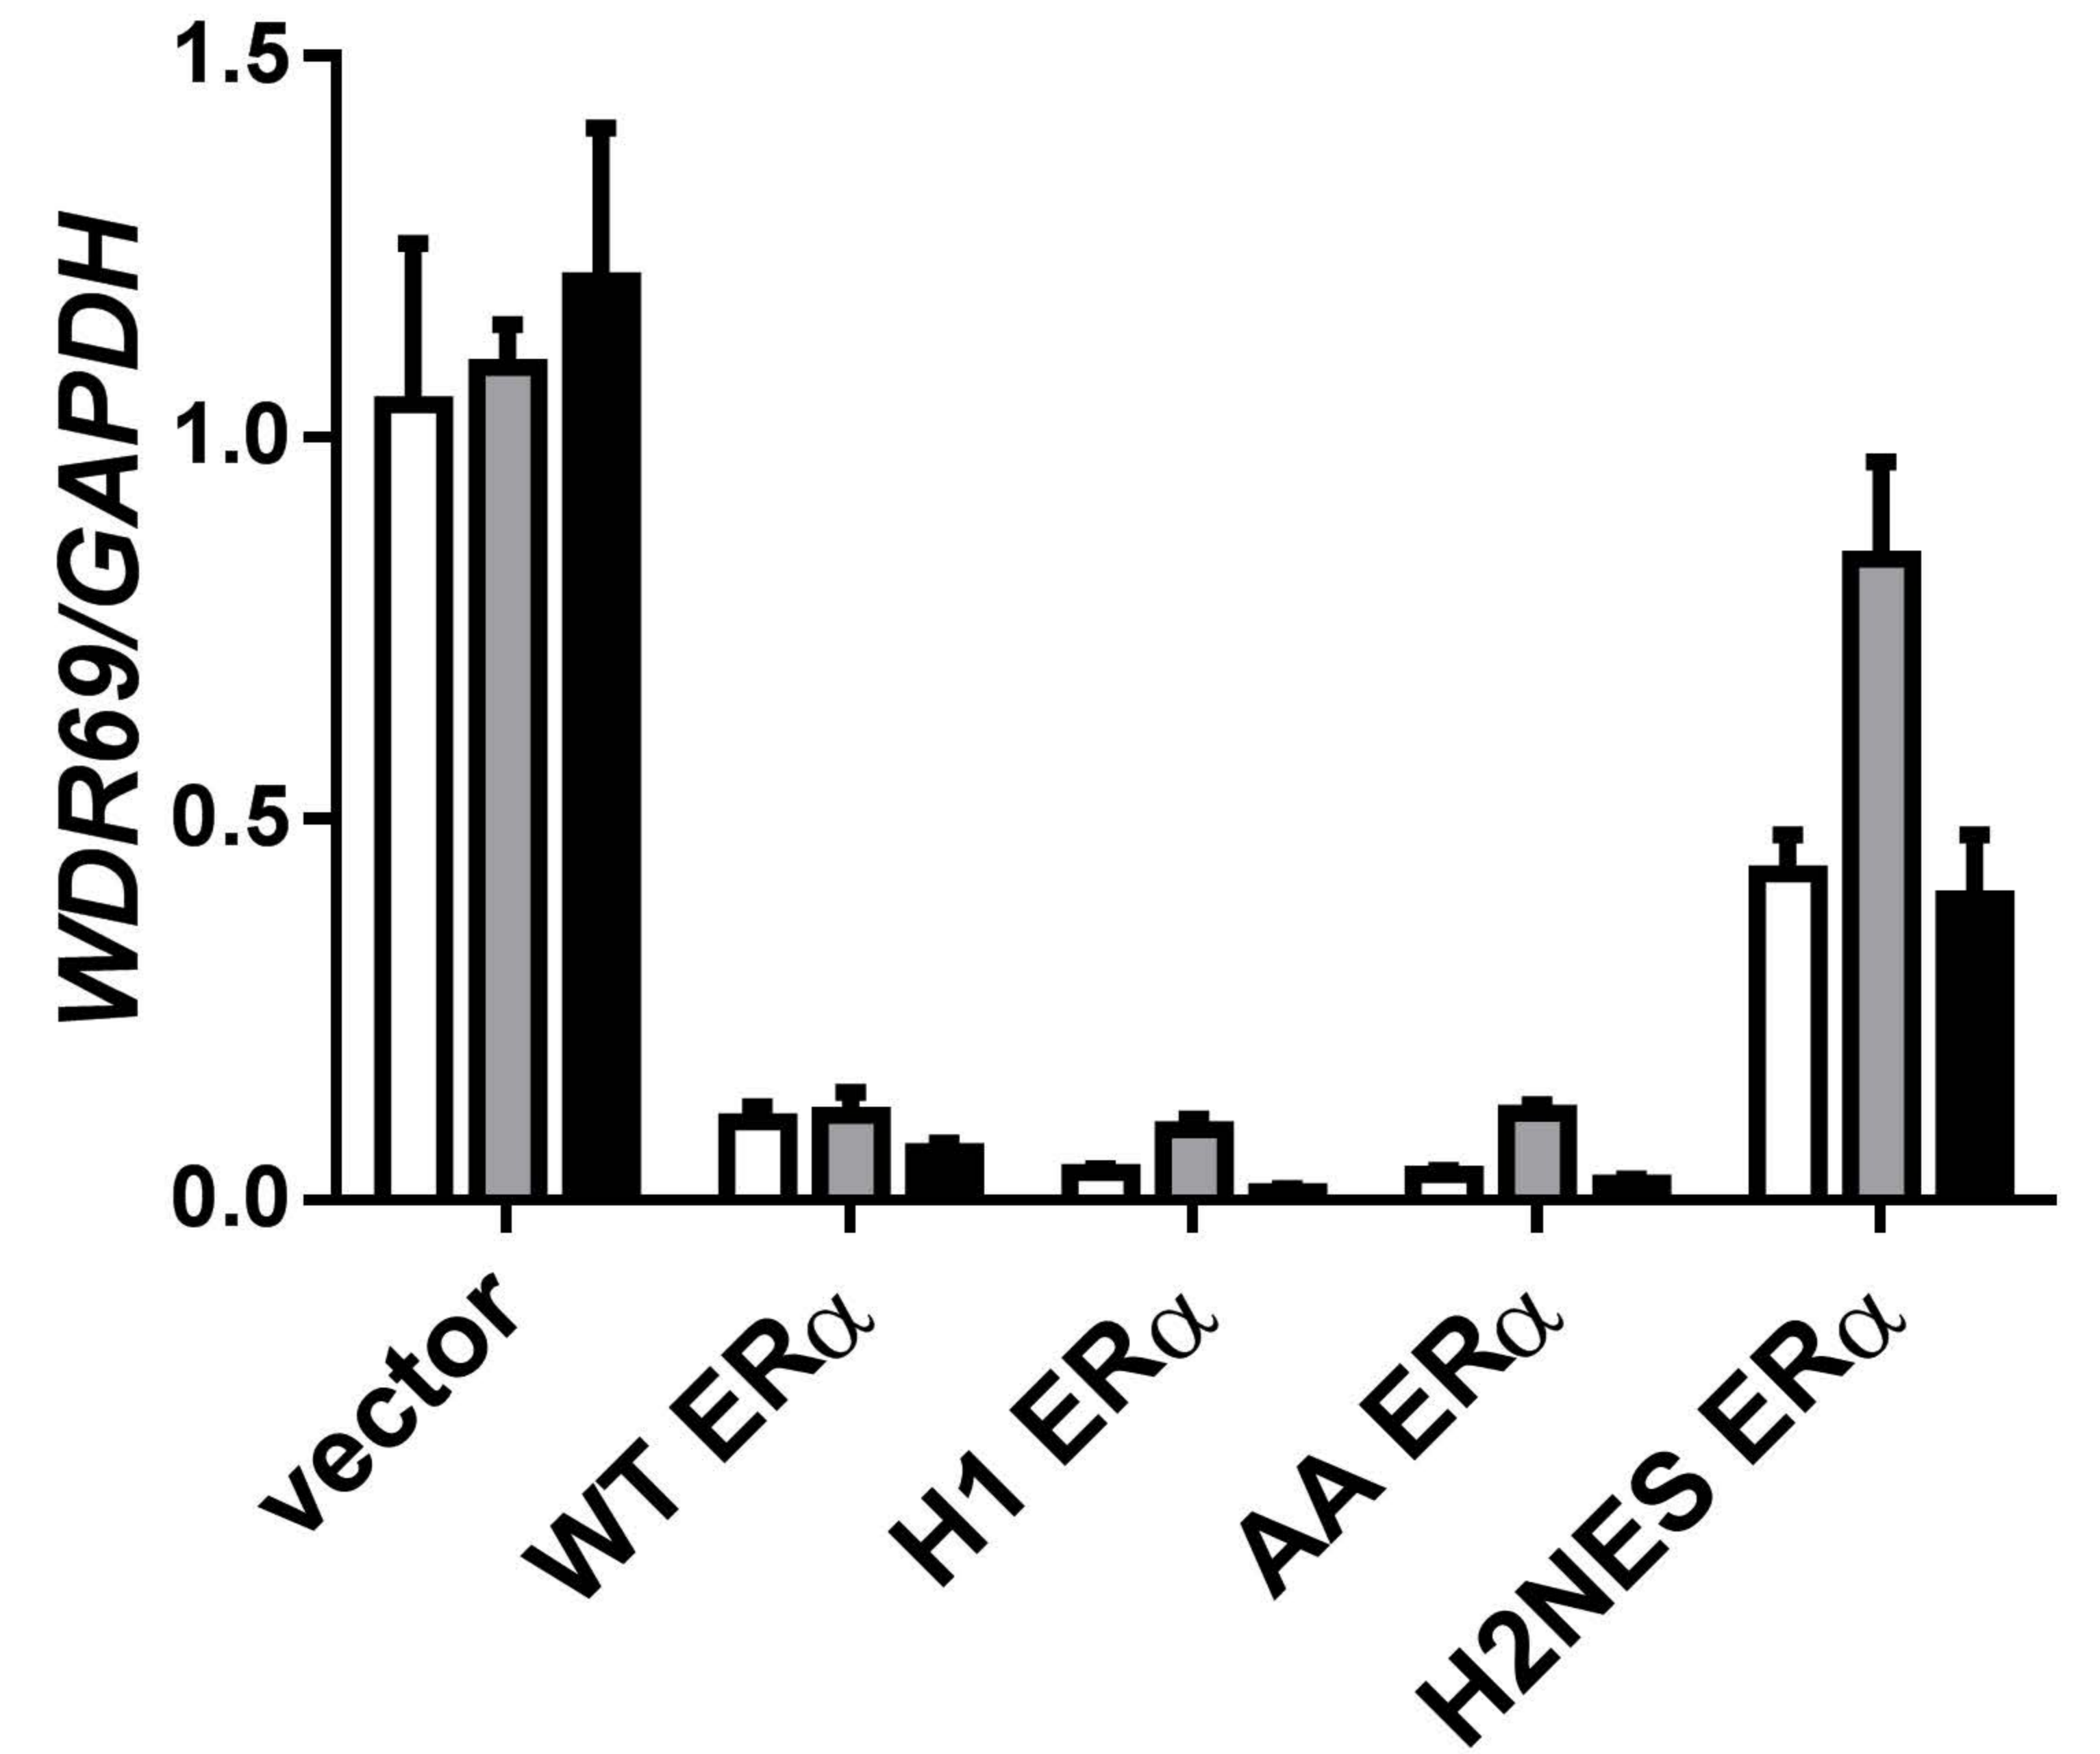

### GSG1L

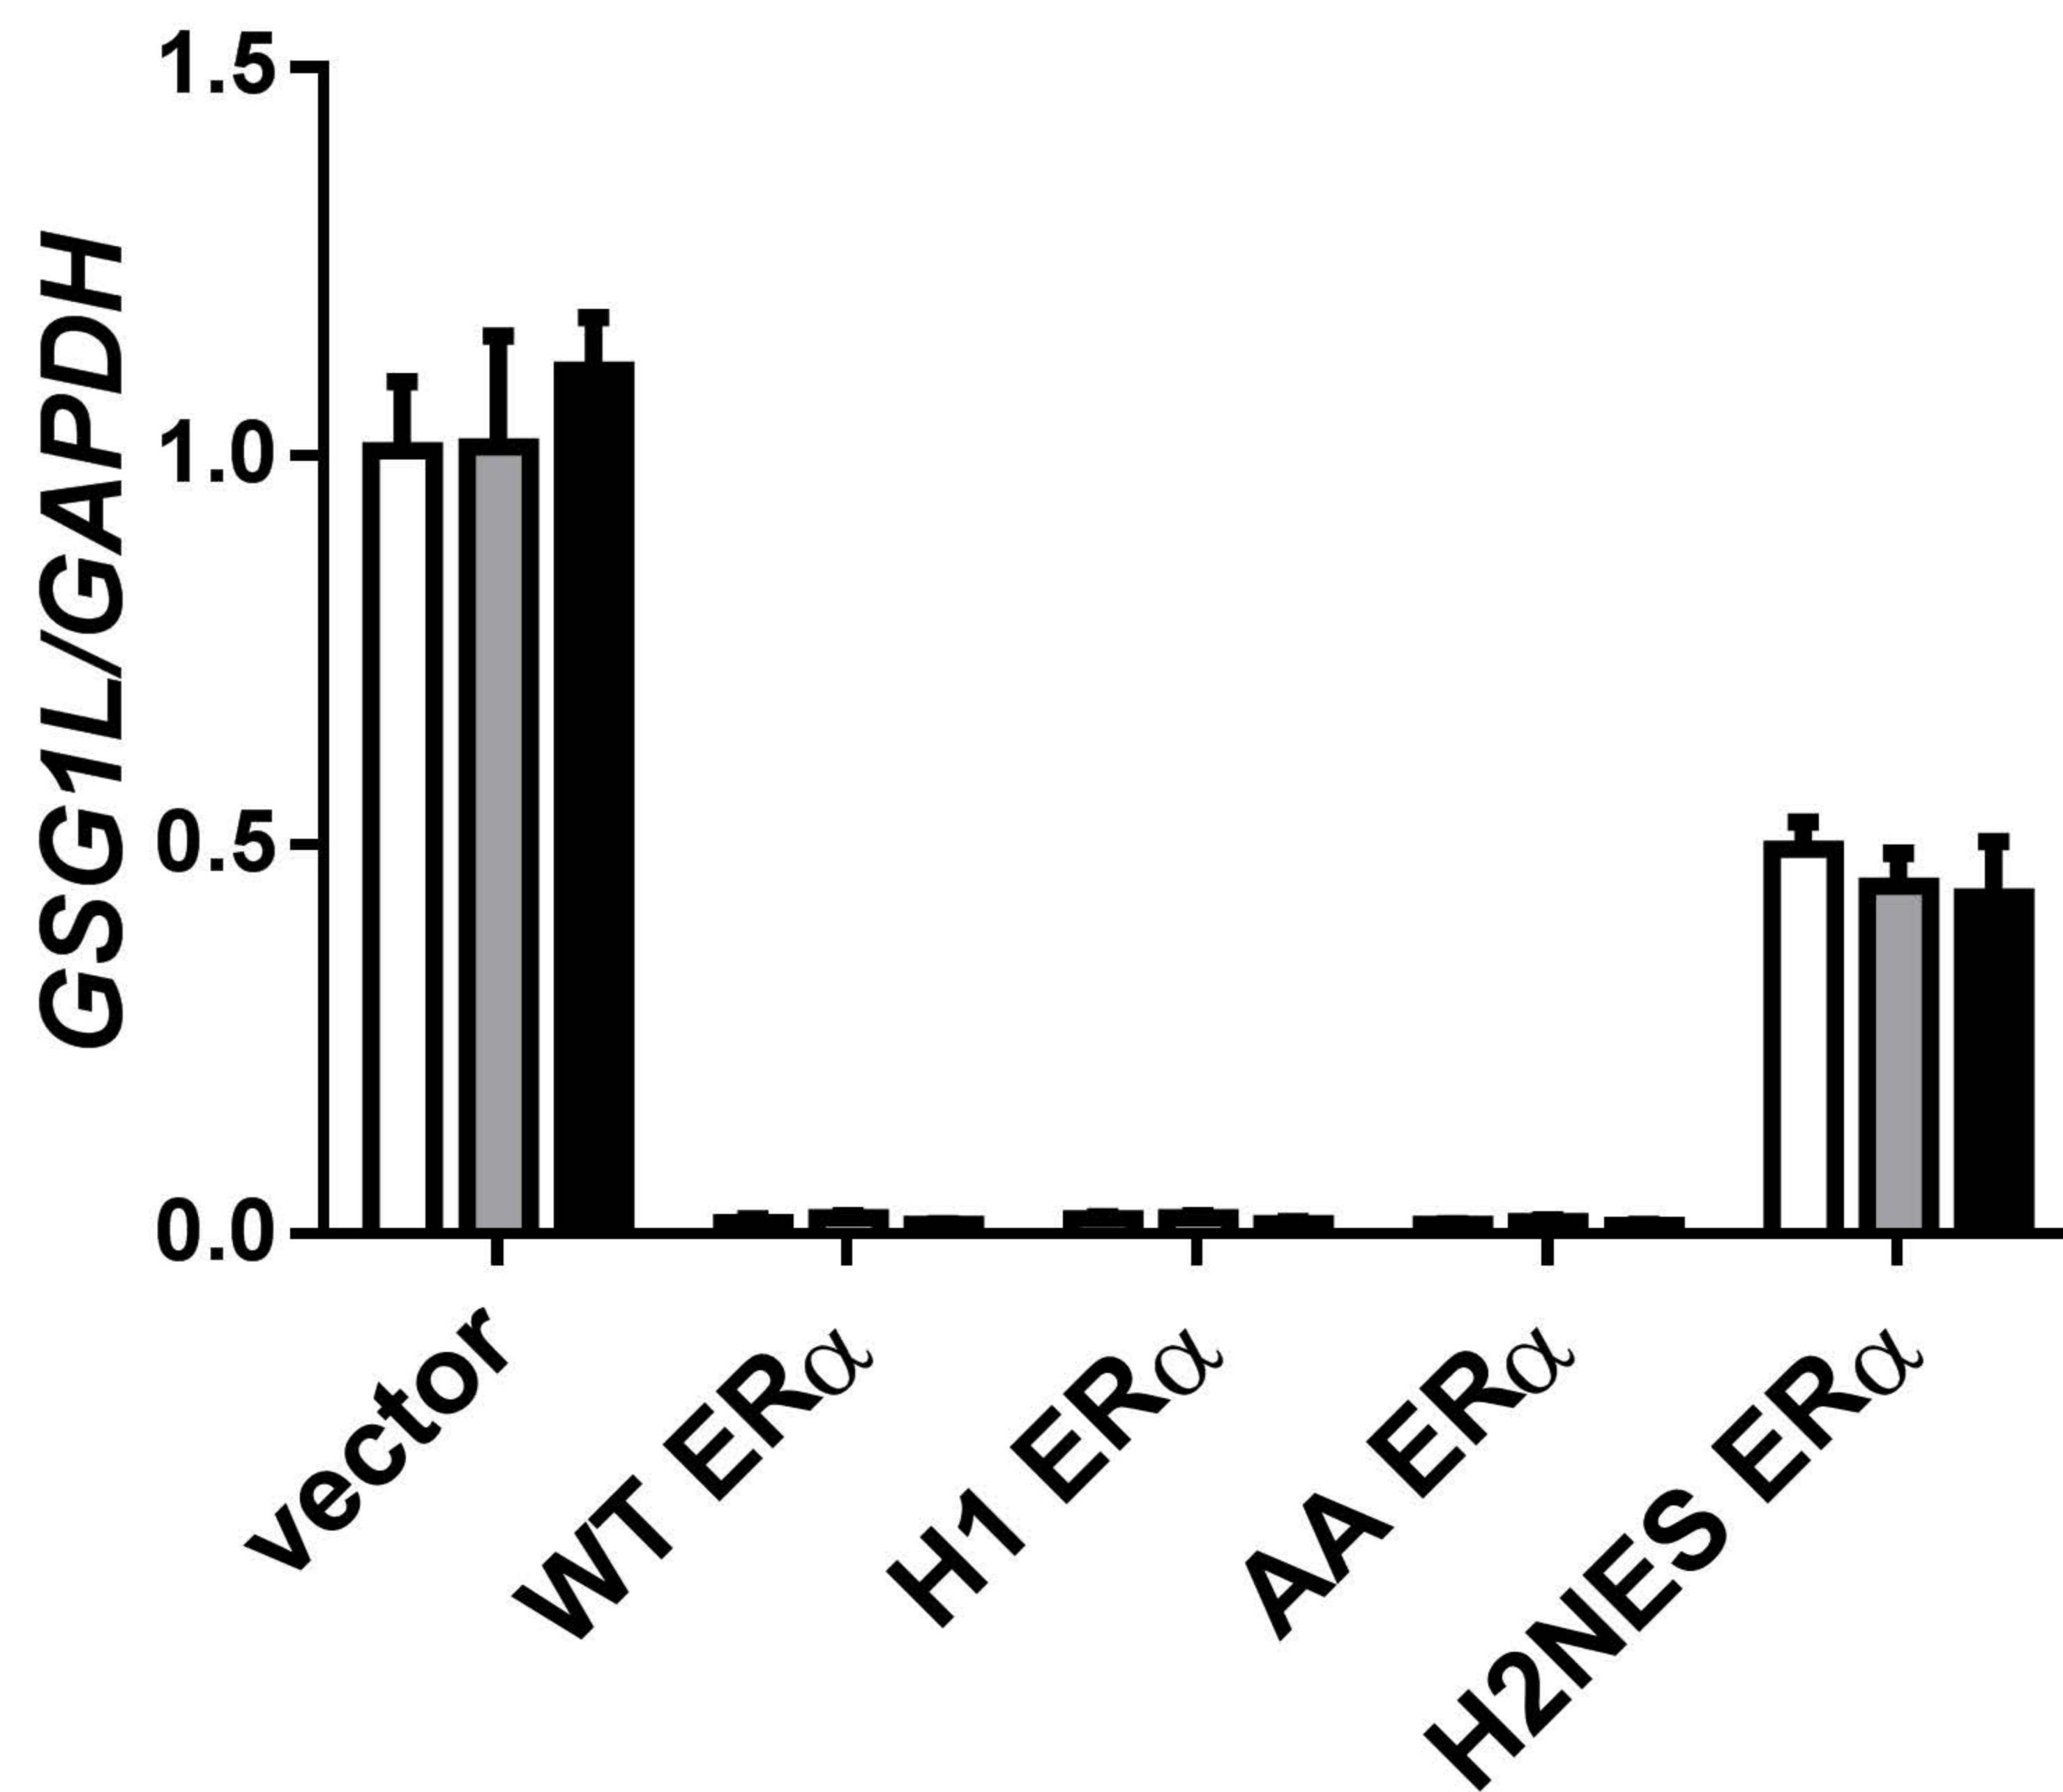

### ITGB3

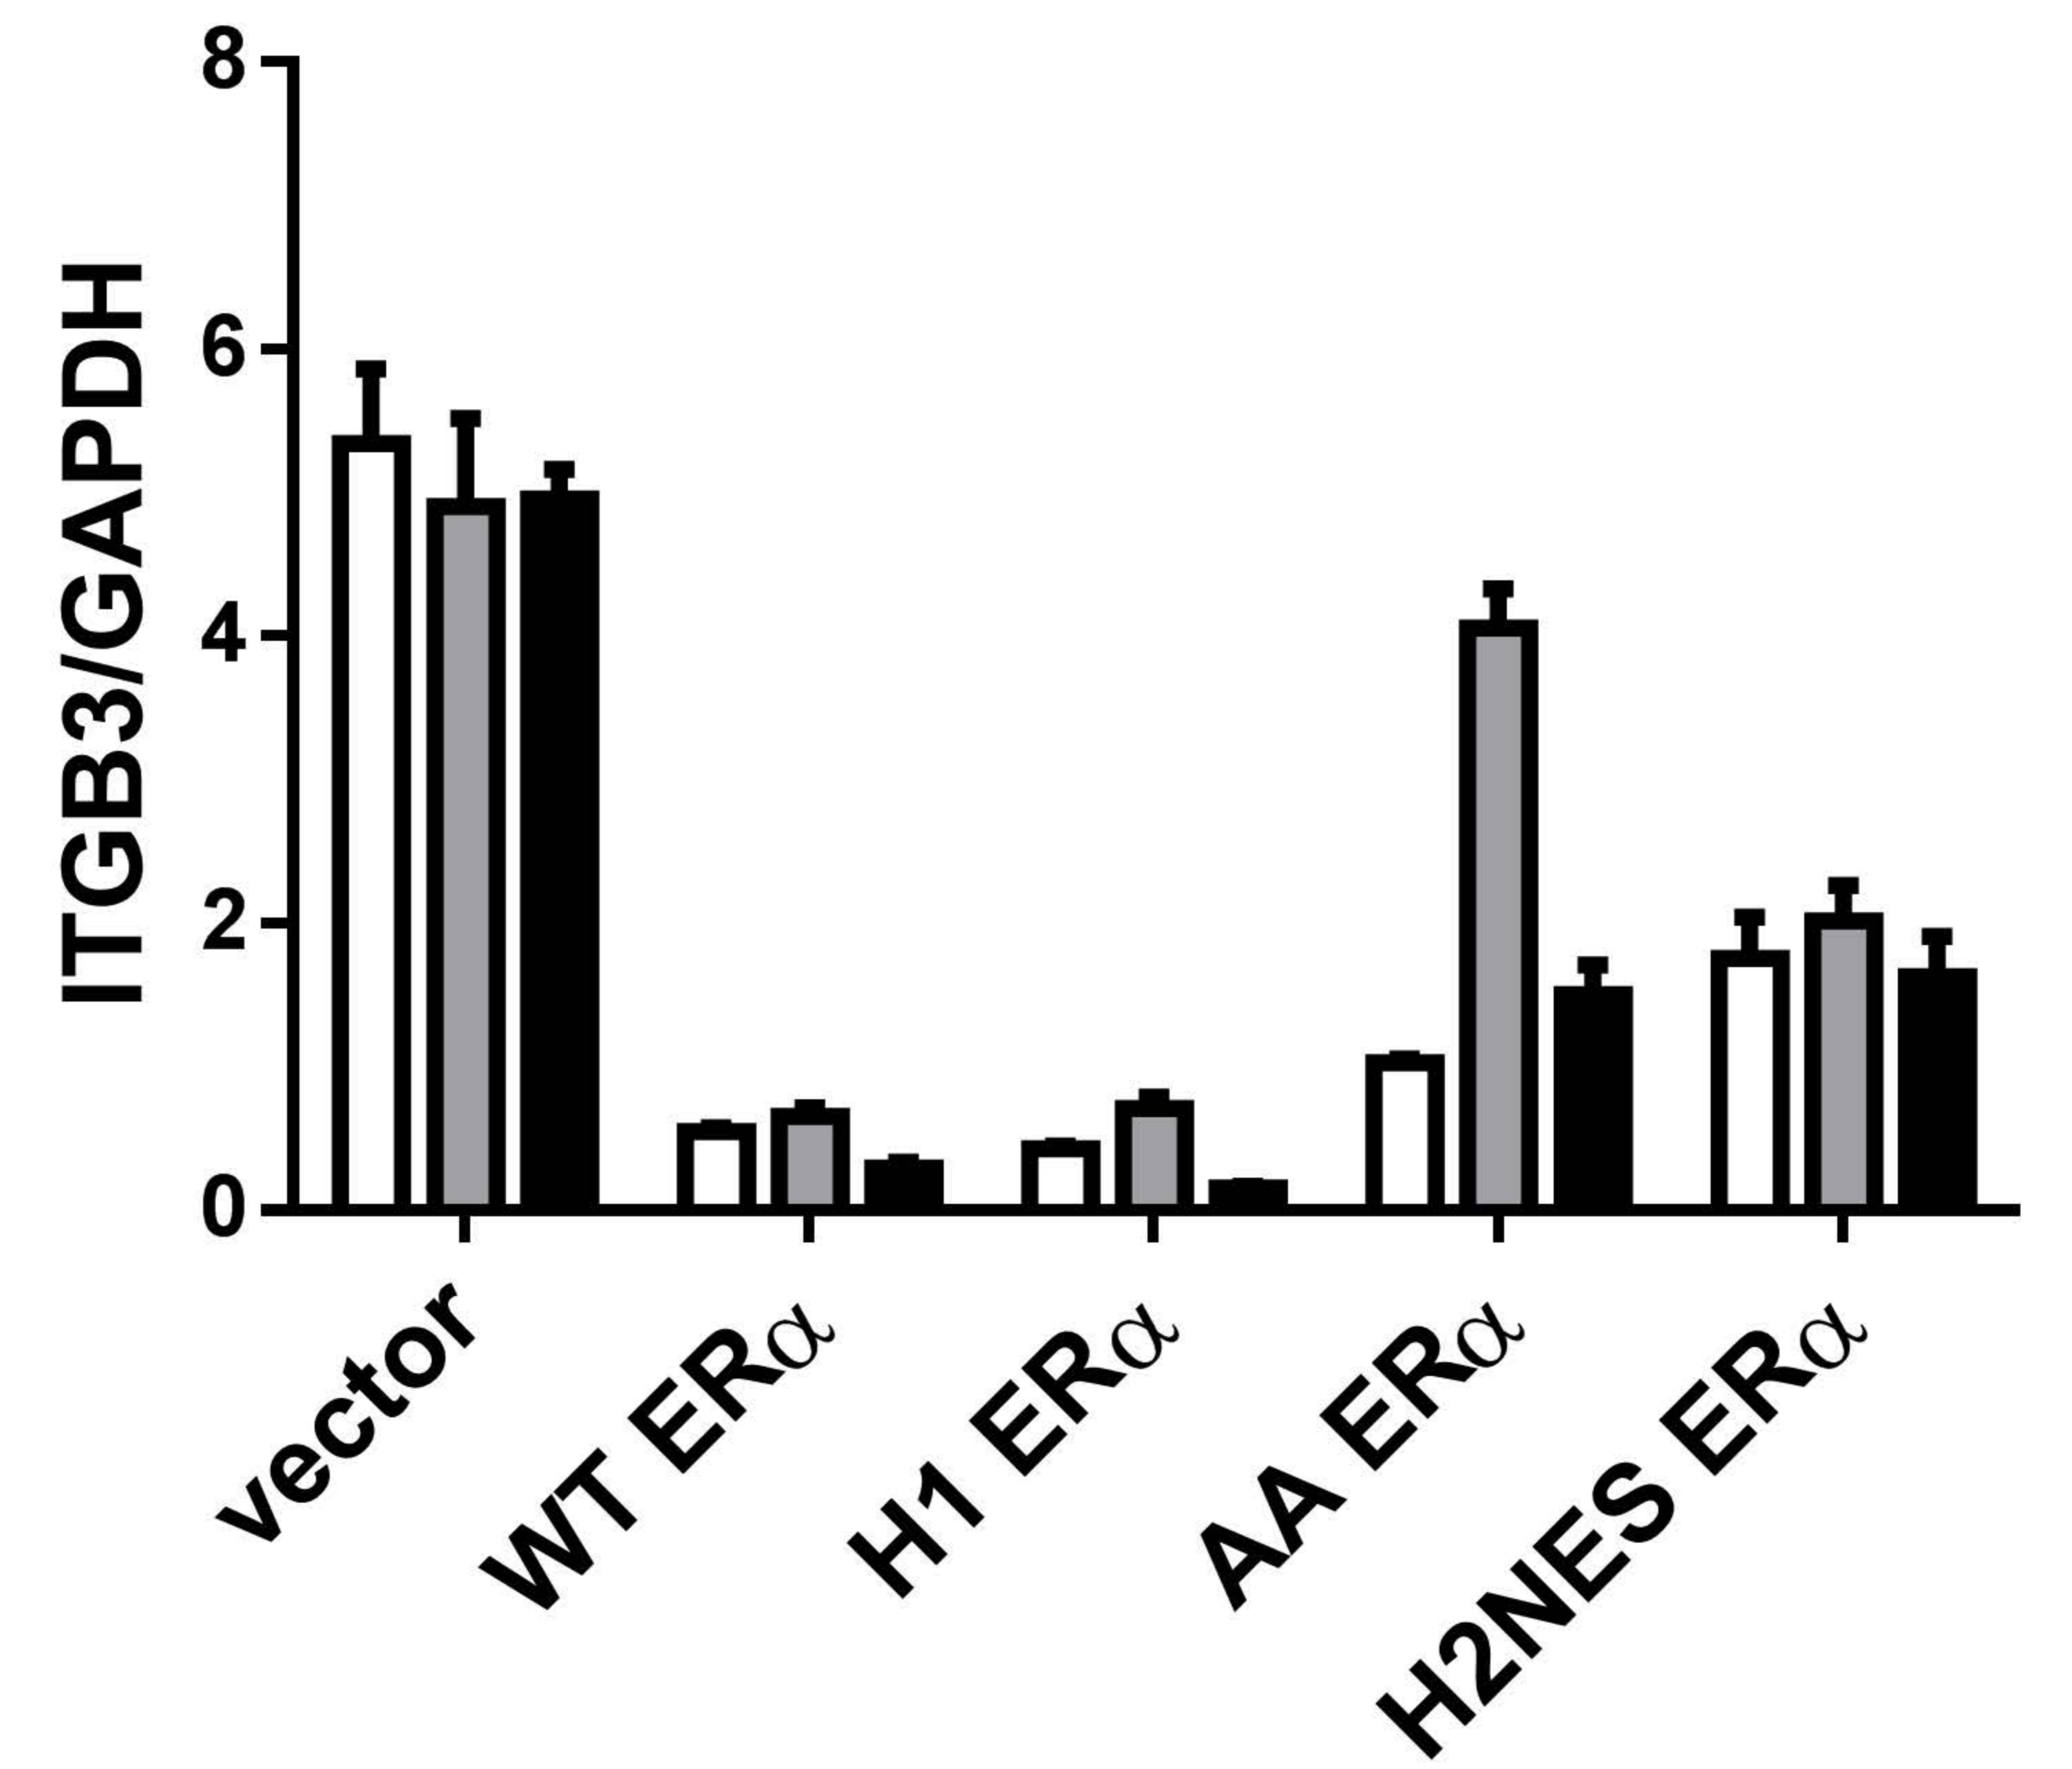

Supplemental Figure 1

Supplement: me-14-1122.pdf [file me-14-1122.pdf]
